# Supplementary material for: Deletion of tumour necrosis factor α receptor 1 elicits an increased TH17 immune response in the chronically inflamed liver
Source: PubMed Central journal article supplement (PMC6414655; doi:10.1038/s41598-019-40324-z), 2019-03-12
Supplement: 41598_2019_40324_MOESM1_ESM.pdf [file 41598_2019_40324_MOESM1_ESM.pdf]

# Deletion of tumour necrosis factor $\alpha$ receptor 1 elicits an increased TH17 immune response in the chronically inflamed liver

Laura Berkhout, Roja Barikbin, Birgit Schiller, Gevitha Ravichandran, Till Krech, Katrin Neumann, Gabriele Sass, Gisa Tiegs

## Supplementary Figures

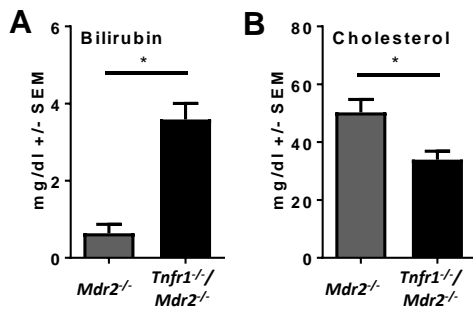

### Supplementary Figure 1: Marker of cholestasis in *Tnfr1*<sup>-/-</sup>/*Mdr2*<sup>-/-</sup> mice.

(A) Plasma concentrations of bilirubin and (B) cholesterol in *Mdr2*<sup>-/-</sup> (n = 4) and *Tnfr1*<sup>-/-</sup>/*Mdr2*<sup>-/-</sup> (n = 5) mice (10-12 weeks of age). \*P ≤ 0.05

**A Gating strategy: flow cytometric analysis of TH17 cells (Figure 3)**

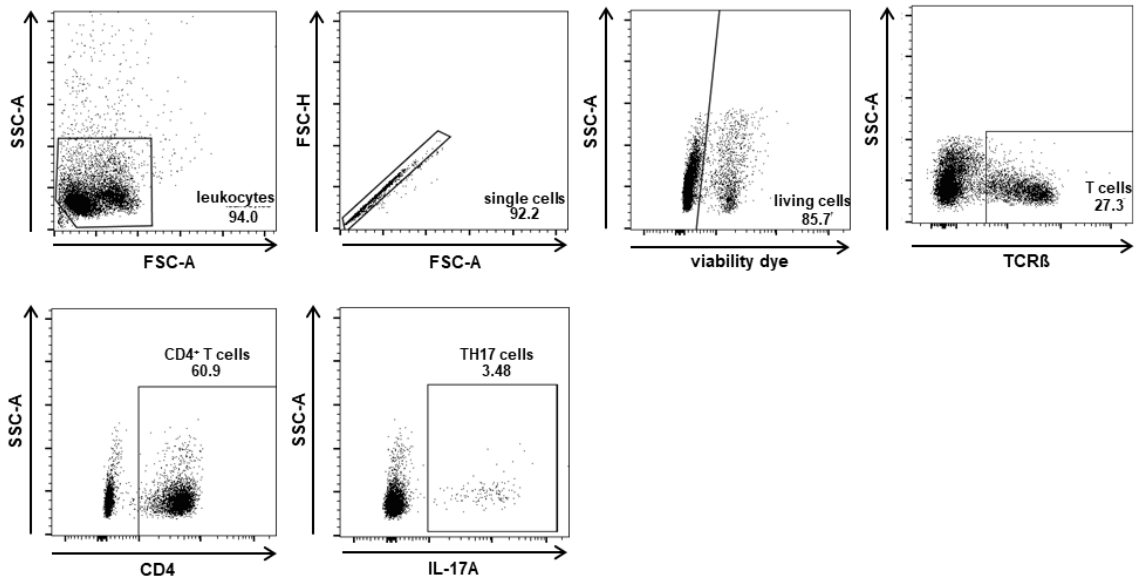

**B Gating strategy: fluorescence-activated cell sort of CD11b<sup>+</sup>CX3CR1<sup>-/-</sup> cells (12w; Figure 4)**

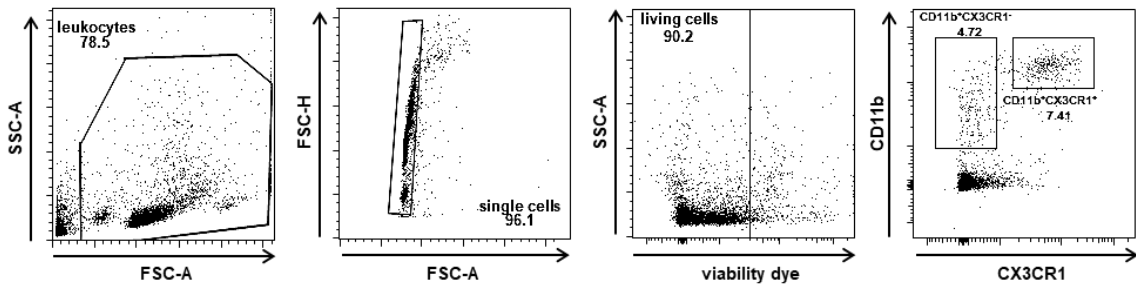

**C Gating strategy: flow cytometric analysis of CD11b<sup>+</sup>CX3CR1<sup>+</sup> cells (24w; Figure 5)**

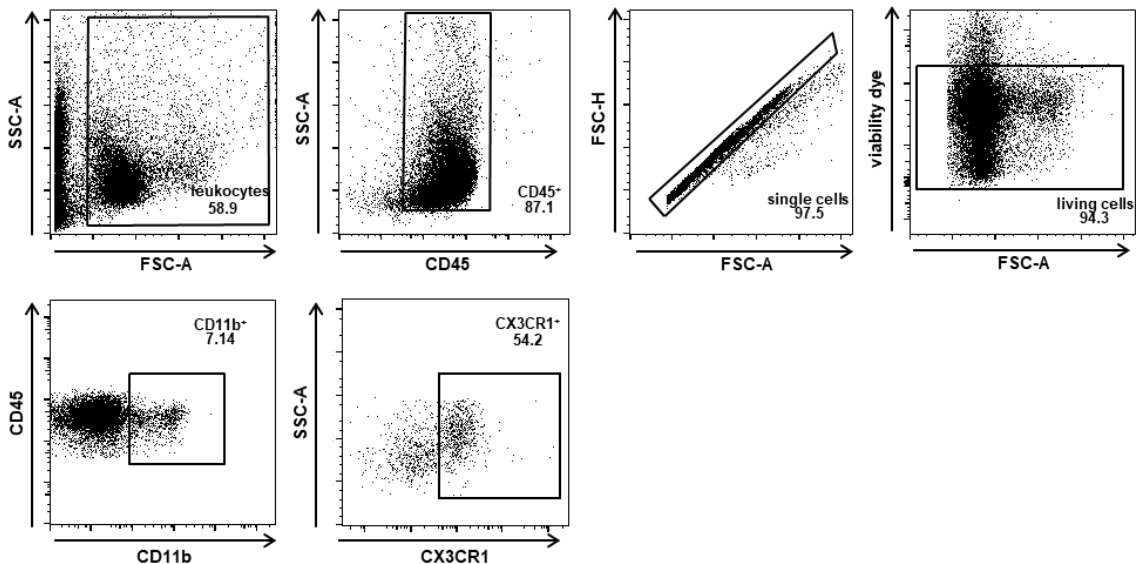

**Supplementary Figure 2: Gating strategies.**

For all analysis living total leukocytes were determined by forward / sideward scatter, and exclusion of dead cells. (A) TH17 cells were defined as TCRβ<sup>+</sup> CD4<sup>+</sup> IL-17<sup>+</sup> cells. (B) Cells were sorted for CD11b<sup>+</sup> and CX3CR1<sup>-/-</sup>. (C) Cells were defined as CD45<sup>+</sup> CD11b<sup>+</sup> and CX3CR1<sup>+</sup>.

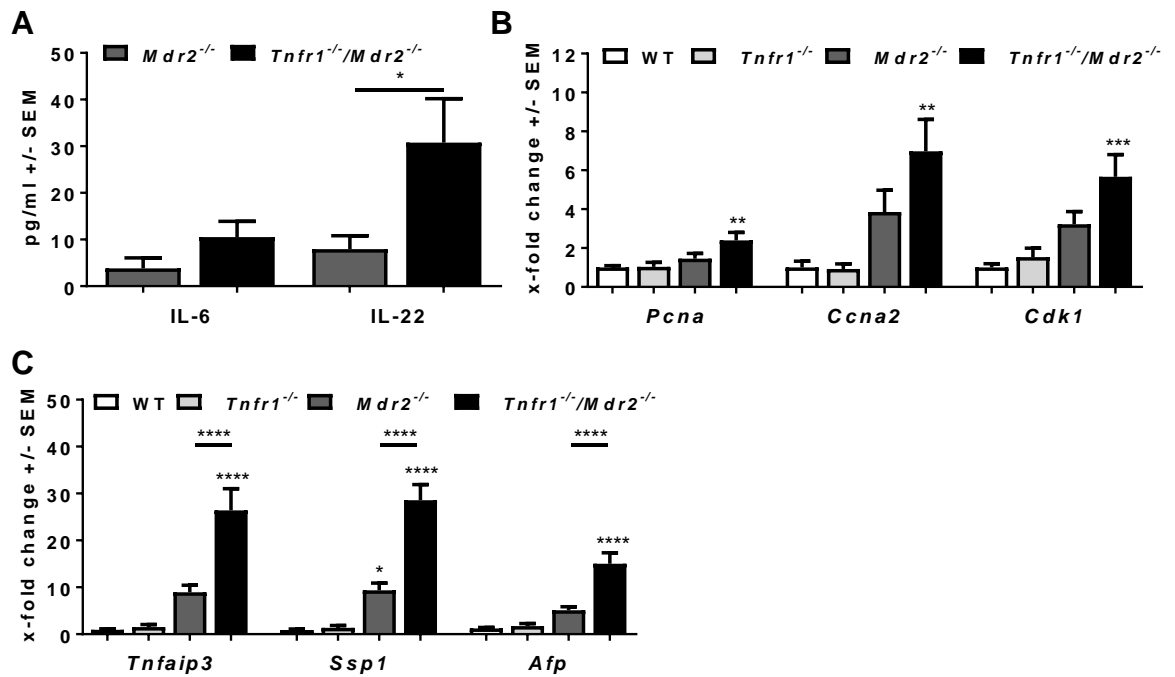

**Supplementary Figure 3: Hepatic proliferation and differentiation in *Tnfr1*<sup>-/-</sup>/*Mdr2*<sup>-/-</sup> mice.** (A) Plasma levels of STAT3 inducing cytokines IL-6 and IL-22 in *Mdr2*<sup>-/-</sup> (n = 8) and *Tnfr1*<sup>-/-</sup>/*Mdr2*<sup>-/-</sup> (n = 8) mice measured via Legendplex. (B) Hepatic gene expression analysis of proliferation marker *Pcna*, *Ccna2* and *Cdk1* and (C) tumour marker *Tnfaip3*, *Ssp1*, and *Afp* in WT (n ≥ 10), *Tnfr1*<sup>-/-</sup> (n = 9), *Mdr2*<sup>-/-</sup> (n ≥ 9) and *Tnfr1*<sup>-/-</sup>/*Mdr2*<sup>-/-</sup> (n ≥ 10) determined by RT-qPCR. \*P ≤ 0.05, \*\*P ≤ 0.01, \*\*\*P ≤ 0.001.

**Full length western blots pf phosphorylated RIP3, MLKL and GAPDH as loading control**

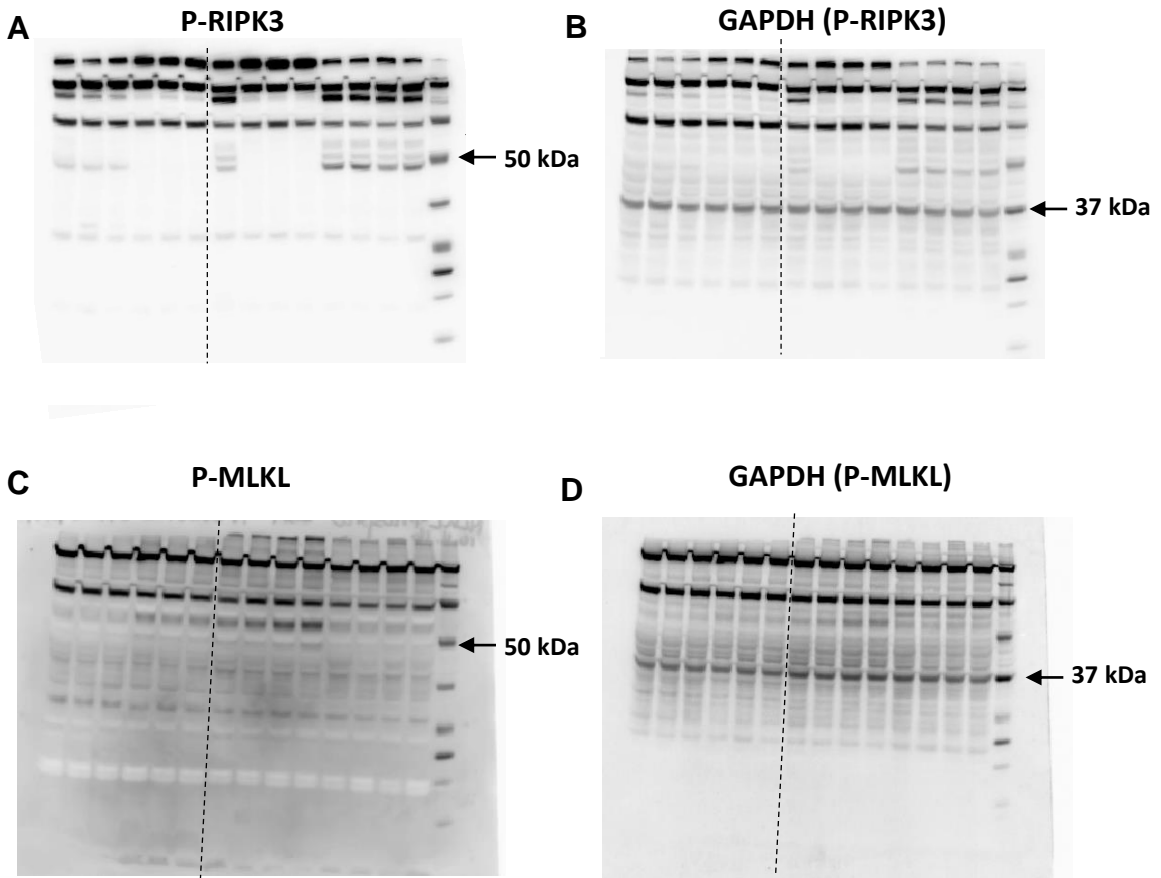

**Supplementary Figure 4: Full length western blots of data presented in Figure 4B.**

The liver tissue samples lysates for the western blot analysis of P-RIPK3 and P-MLKL were derived from the same experiment and gels/blots were processed in parallel. Gels were loaded as follows, left lane 1-3 WT, Lane 4-6: *Tnfr1*<sup>-/-</sup>, lane 7-10: *Mdr2*<sup>-/-</sup>, lane 11-14: *Tnfr1*<sup>-/-</sup>/*Mdr2*<sup>-/-</sup>, Lane 15: molecular marker (Precision Plus Protein WesternC Standards). Each lane depicts one animal. Only lanes 7-15 are displayed in the main article, dashed lines indicate where images were cropped.
